# Supplementary material
Source: Copernicus journal article supplement (doi:10.5194/we-26-83-2026)
Supplement: Supplementary file 1 [file we-26-83-2026-supplement.pdf]

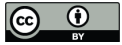

*Supplement of*

## **Blueberry floral morphology influences pollinator visitation and behavioural patterns**

**Helena Castro et al.**

*Correspondence to:* Helena Castro ([hecastro@ci.uc.pt](mailto:hecastro@ci.uc.pt))

The copyright of individual parts of the supplement might differ from the article licence.

## Supplementary material

Table S1. Mean ( $\pm$ SE) corolla length, corolla width and corolla opening for each of the cultivars used in this study.

| Cultivar    | Corolla length (mm) | Corolla width (mm) | Corolla opening (mm) |
|-------------|---------------------|--------------------|----------------------|
| Aurora      | 8.45 $\pm$ 0.06     | 6.38 $\pm$ 0.05    | 4.69 $\pm$ 0.17      |
| Bluecrop    | 9.18 $\pm$ 0.09     | 6.55 $\pm$ 0.09    | 3.60 $\pm$ 0.07      |
| Bluegold    | 8.03 $\pm$ 0.05     | 6.22 $\pm$ 0.11    | 4.58 $\pm$ 0.12      |
| Chandler    | 11.76 $\pm$ 0.05    | 7.50 $\pm$ 0.10    | 4.02 $\pm$ 0.04      |
| Draper      | 9.95 $\pm$ 0.09     | 7.72 $\pm$ 0.09    | 3.57 $\pm$ 0.10      |
| Duke        | 9.23 $\pm$ 0.10     | 7.62 $\pm$ 0.07    | 4.22 $\pm$ 0.11      |
| Elliot      | 8.75 $\pm$ 0.16     | 6.55 $\pm$ 0.10    | 4.29 $\pm$ 0.12      |
| Huron       | 7.98 $\pm$ 0.13     | 6.30 $\pm$ 0.10    | 2.84 $\pm$ 0.04      |
| Legacy      | 8.54 $\pm$ 0.09     | 6.69 $\pm$ 0.09    | 4.23 $\pm$ 0.13      |
| Liberty     | 9.18 $\pm$ 0.08     | 6.35 $\pm$ 0.10    | 4.12 $\pm$ 0.16      |
| Ochlockonee | 9.17 $\pm$ 0.16     | 6.04 $\pm$ 0.13    | 3.25 $\pm$ 0.03      |
| Biloxi      | 7.07 $\pm$ 0.08     | 5.43 $\pm$ 0.07    | 3.75 $\pm$ 0.12      |
| Camelia     | 7.51 $\pm$ 0.09     | 6.42 $\pm$ 0.05    | 4.09 $\pm$ 0.09      |
| Misty       | 7.01 $\pm$ 0.20     | 4.85 $\pm$ 0.10    | 2.60 $\pm$ 0.09      |
| O'Neil      | 7.40 $\pm$ 0.12     | 5.66 $\pm$ 0.07    | 3.04 $\pm$ 0.08      |
| Rebel       | 7.21 $\pm$ 0.20     | 4.76 $\pm$ 0.15    | 2.48 $\pm$ 0.13      |
| Sharpblue   | 7.17 $\pm$ 0.25     | 5.20 $\pm$ 0.20    | 3.06 $\pm$ 0.20      |
| Star        | 6.51 $\pm$ 0.11     | 4.91 $\pm$ 0.09    | 3.07 $\pm$ 0.19      |
| Suziblue    | 6.94 $\pm$ 0.05     | 4.43 $\pm$ 0.07    | 2.82 $\pm$ 0.07      |

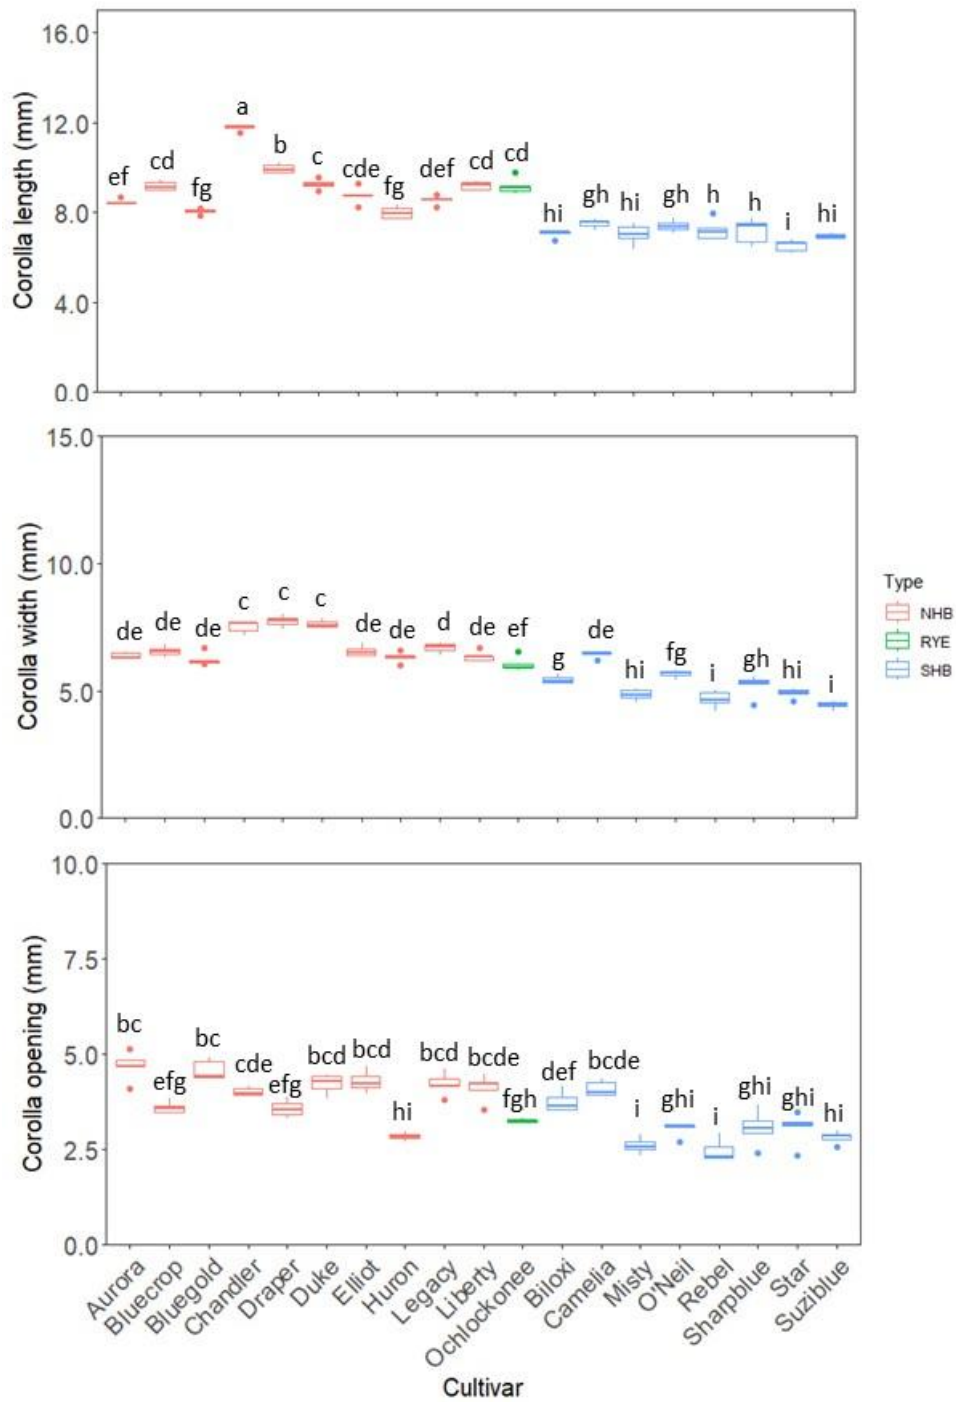

Figure S1. Boxplot showing the variation in the flower morphological traits of 19 blueberry cultivars.

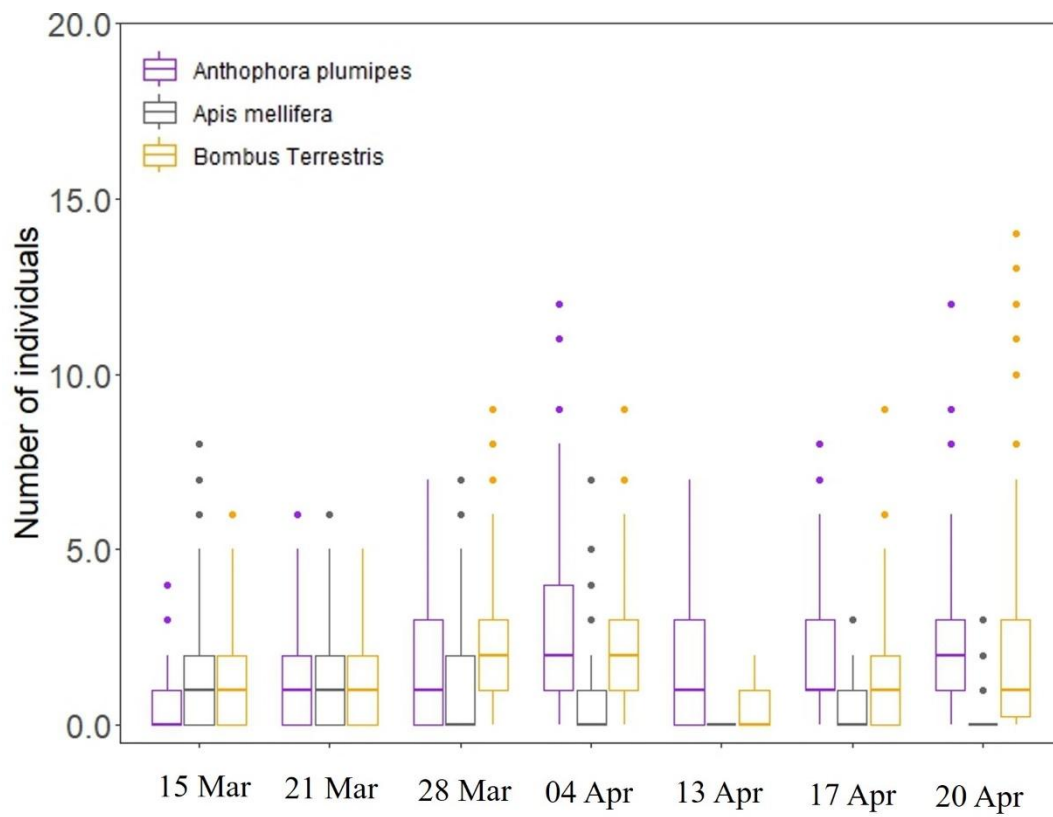

Figure S2. Boxplot showing the number of individuals of the three main pollinator species that interacted with blueberry flowers (as legitimate visitors or robbers) at each sampling time.
